# Supplementary material
Source: Springer Nature journal article supplement (https://www.springermedizin.de/resource/supplementary/12913_2012_3119_MOESM1_ESM.pdf/9532470)

● self-employed

■ employed

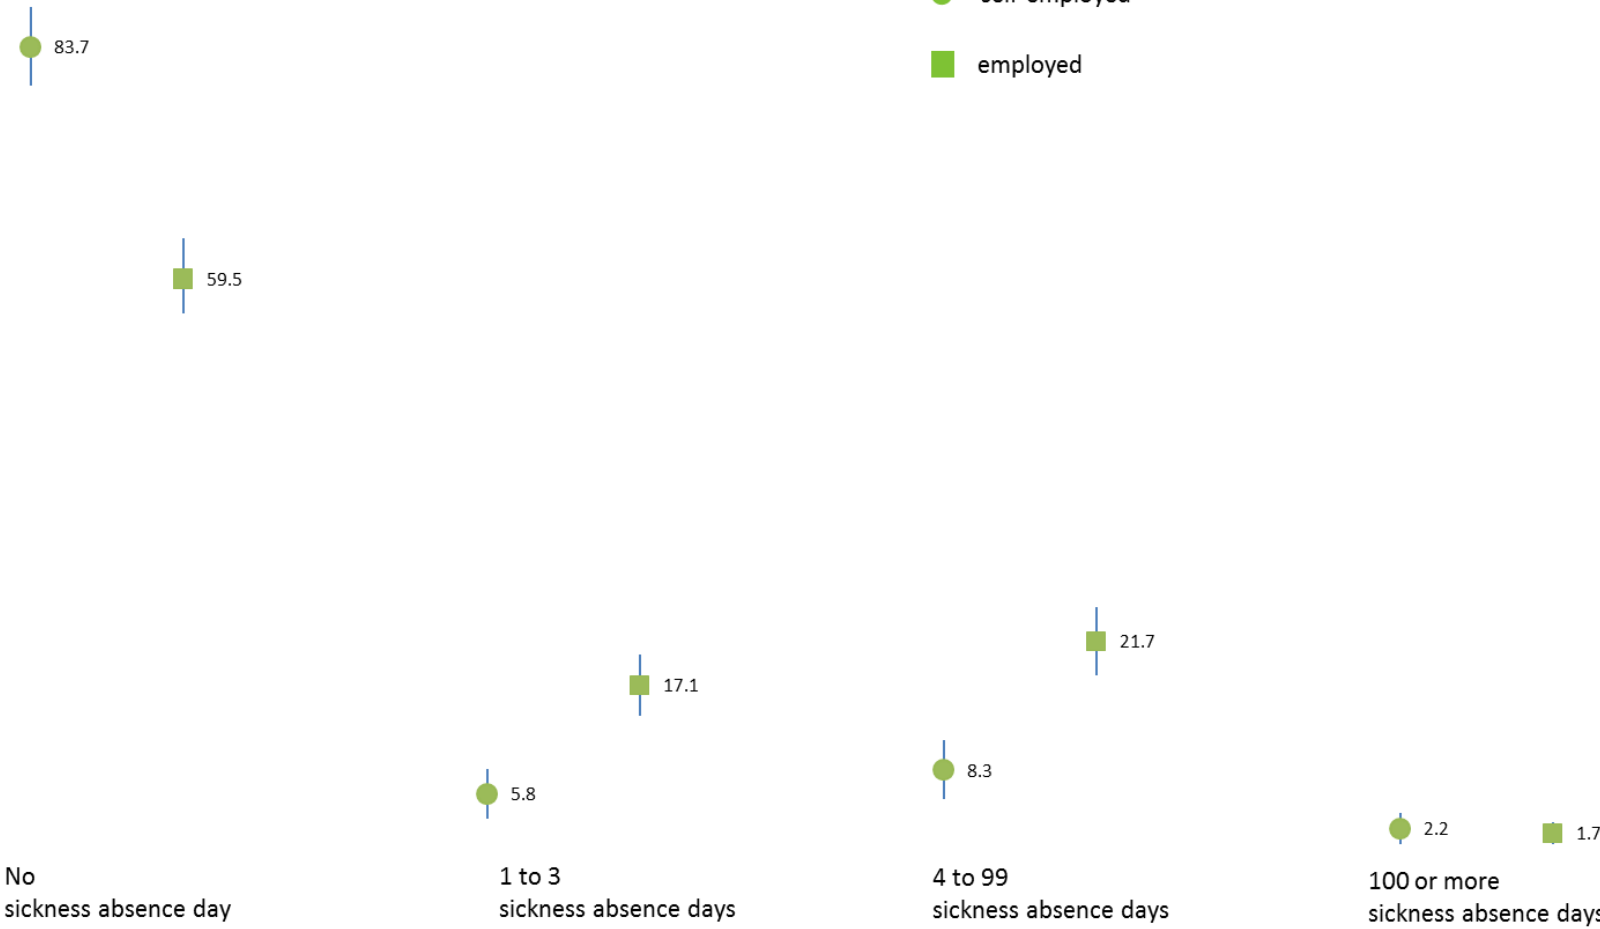

Supplement: MOESM1 [file 9532470]
